# Supplementary material for: A prospective open‐label trial of a CBD/THC cannabis oil in dravet syndrome
Source: PubMed Central journal article supplement — Ann Clin Transl Neurol. 2018 Aug 1;5(9):1077–88. doi: 10.1002/acn3.621 (PMC6144444; doi:10.1002/acn3.621), 2018-08-01
Supplement: ACN3-5-1077-s002.pdf [file ACN3-5-1077-s002.pdf]

Supplemental File 2: Schedule of Events Table:

| <b>Study Period</b>            | <b>Week #</b>                                                                                                                                                                                                                        | <b>Participant/ study team interaction</b>                                                                                                                                                                                                               |
|--------------------------------|--------------------------------------------------------------------------------------------------------------------------------------------------------------------------------------------------------------------------------------|----------------------------------------------------------------------------------------------------------------------------------------------------------------------------------------------------------------------------------------------------------|
| <b>Pre-Intervention Period</b> | -4                                                                                                                                                                                                                                   | Clinic visit – education, baseline physical and neurological review and urine test for THC for those only who have not been on cannabinoids for at least last 60 days.                                                                                   |
| <b>Baseline analysis</b>       | -4 to 0                                                                                                                                                                                                                              | Participant parent/legal guardian completion of seizure diary; 24 hour ambulatory EEG, psychologist will arrange for parent/caregiver to complete a Vineland assessment                                                                                  |
| <b>Intervention period</b>     | 0                                                                                                                                                                                                                                    | Clinic visit – education, weight, physical and neurological review; baseline bloodwork; collection of baseline seizure diary; education regarding dosing of study product; parent to complete baseline QOLCE                                             |
|                                | 1                                                                                                                                                                                                                                    | Telephone and/ or email contact by study team to determine dosing and tolerability                                                                                                                                                                       |
|                                | 2                                                                                                                                                                                                                                    | Clinic visit – tolerance review, adverse events,; physical and neurological exam; parent/legal guardian to complete PESQ; seizure diary review                                                                                                           |
|                                | 3                                                                                                                                                                                                                                    | Telephone and/ or email contact by study team to determine dosing and tolerability                                                                                                                                                                       |
|                                | 4                                                                                                                                                                                                                                    | Clinic visit – tolerance review, adverse events; physical and neurological exam; parent/legal guardian to complete PESQ; seizure diary review; bloodwork                                                                                                 |
|                                | 5                                                                                                                                                                                                                                    | Telephone and/ or email contact by study team to determine dosing and tolerability                                                                                                                                                                       |
|                                | 6                                                                                                                                                                                                                                    | Telephone and/ or email contact by study team to determine dosing and tolerability                                                                                                                                                                       |
|                                | 7                                                                                                                                                                                                                                    | Telephone and/ or email contact by study team to determine dosing and tolerability                                                                                                                                                                       |
|                                | 8                                                                                                                                                                                                                                    | Clinic visit – tolerance review, adverse events; physical and neurological exam; parent/legal guardian to complete PESQ and QOLCE; seizure diary review; bloodwork performed once child is at target / maximal tolerated dose (any stage from week 8-16) |
|                                | 10                                                                                                                                                                                                                                   | Telephone and/ or email contact by study team to determine dosing and tolerability                                                                                                                                                                       |
| 12                             | Clinic visit – tolerance review, adverse events; physical and neurological exam; parent/legal guardian to complete PESQ; seizure diary review; bloodwork performed once at target / maximal tolerated dose ( if not done previously) |                                                                                                                                                                                                                                                          |

|                                                                           |       |                                                                                                                                                                                                                                                                                                                                                                       |
|---------------------------------------------------------------------------|-------|-----------------------------------------------------------------------------------------------------------------------------------------------------------------------------------------------------------------------------------------------------------------------------------------------------------------------------------------------------------------------|
|                                                                           | 14    | Telephone and/ or email contact by study team to determine dosing and tolerability                                                                                                                                                                                                                                                                                    |
|                                                                           | 16    | Clinic visit – tolerance review, adverse events; physical and neurological exam; parent/legal guardian to complete PESQ and QOLCE; seizure diary review; bloodwork performed once at target / maximal tolerated dose( if not done previously)                                                                                                                         |
| <b>Primary Analysis</b>                                                   | 16-20 | Telephone and/ or email contact by study team at 18 weeks to determine dosing and tolerability<br><br>Psychologist will arrange for parent/legal guardian to complete a Vineland assessment<br><br>Participant parent/legal guardian completion of seizure diary during this 4 weeks; 24 hour ambulatory EEG. Collection of seizure diary reported seizure frequency. |
| <b>Longitudinal follow-up period (if participant chooses to continue)</b> | 28    | <i>Clinic visit – tolerance review; physical and neurological exam; parent/legal guardian to complete PESQ and QOLCE; seizure diary review;</i>                                                                                                                                                                                                                       |
|                                                                           | 40    | <i>Clinic visit – tolerance review; physical and neurological exam; parent/legal guardian to complete PESQ; seizure diary review;</i><br><br><i>Follow up bloodwork performed once (any stage from week 40-64)</i>                                                                                                                                                    |
|                                                                           | 52    | <i>Clinic visit – tolerance review; physical and neurological exam; parent/legal guardian to complete PESQ and QOLCE; seizure diary review;</i><br><br><i>Follow up blood work performed once (if not done previously)</i><br><br><i>During 52-64 weeks psychologist will arrange for parent/caregiver to complete a Vineland assessment</i>                          |
|                                                                           | 64    | <i>Clinic visit – tolerance review; physical and neurological exam; parent/legal guardian to complete PESQ; seizure diary review</i><br><br><i>Follow up blood work performed once (if not done previously)</i>                                                                                                                                                       |
